# Supplementary material for: Elevated temperature increases meiotic crossover frequency via the interfering (Type I) pathway in Arabidopsis thaliana
Source: PLoS Genet. 2018 May 17;14(5):e1007384. doi: 10.1371/journal.pgen.1007384 (PMC5976207; doi:10.1371/journal.pgen.1007384)
Supplement: S5 Table — (XLSX) [file pgen.1007384.s006.xlsx]

## Sheet: raw data
Table S5. Raw qRTPCR data taken from QuantStudio 6 Flex Real-Time PCR system (Applied Biosystems)
Sample	Date	TUB4 Ct1	Gene of interest	GOI Ct1	delta-delta Ct	2-delta-delta Ct	Fold Change
0-10	2017-06-13	21.4335	BHLH122	25.2675
0-11	2017-06-13	20.9598	BHLH122	24.8614
0-13	2017-06-13	19.7939	BHLH122	24.0839
Control mean	2017-06-13	20.7291	BHLH122	24.7376
100-10	2017-06-13	22.812	BHLH122	25.7765	-1.04404	2.06199	2.06199
100-11	2017-06-13	21.1443	BHLH122	24.7904	-0.362423	1.28558	1.28558
200-1	2017-06-13	21.3375	BHLH122	23.9452	-1.40086	2.64058	2.64058
200-10	2017-06-13	23.2201	BHLH122	22.6472	-4.58145	23.9416	23.9416
NTC	2017-06-13	no amp	BHLH122	no amp
0-10	2017-06-13	21.4335	AKR4C9	23.8963
0-11	2017-06-13	20.9598	AKR4C9	24.0642
0-13	2017-06-13	19.7939	AKR4C9	23.3304
Control mean	2017-06-13	20.7291	AKR4C9	23.7636
100-10	2017-06-13	22.812	AKR4C9	24.9924	-0.854181	1.80773	1.81
100-11	2017-06-13	21.1443	AKR4C9	24.7757	0.596891	0.661177	-1.51245
200-1	2017-06-13	21.3375	AKR4C9	22.2644	-2.10764	4.30985	4.31
200-10	2017-06-13	23.2201	AKR4C9	22.0403	-4.21431	18.5624	18.56
NTC	2017-06-13	no amp	AKR4C9	no amp
0-10	2017-06-15	21.2961	BHLH122	25.1192
0-15	2017-06-15	20.2063	BHLH122	24.1277
0-16	2017-06-15	20.0204	BHLH122	23.5816
Control mean	2017-06-15	20.5076	BHLH122	24.2762
100-13	2017-06-15	20.322	BHLH122	24.4023	0.311789	0.805642	-1.24125
100-4	2017-06-15	21.0609	BHLH122	24.2525	-0.576921	1.49166	1.49
100-5	2017-06-15	23.7313	BHLH122	26.6336	-0.866261	1.82293	1.82
100-7	2017-06-15	20.059	BHLH122	23.7886	-0.0389881	1.02739	1.03
100-8	2017-06-15	21.0134	BHLH122	25.1809	0.398924	0.758424	-1.31852
100-9	2017-06-15	20.5304	BHLH122	24.4998	0.200832	0.870048	-1.14936
200-2	2017-06-15	21.6212	BHLH122	23.4058	-1.98399	3.95585	3.96
200-3	2017-06-15	22.9389	BHLH122	22.1135	-4.59397	24.1504	24.15
200-4	2017-06-15	20.9085	BHLH122	24.1875	-0.48951	1.40397	1.4
200-6	2017-06-15	21.9335	BHLH122	22.1604	-3.54169	11.6454	11.64
200-7	2017-06-15	22.4422	BHLH122	22.1693	-4.04146	16.4665	16.47
200-9	2017-06-15	21.982	BHLH122	22.1026	-3.64796	12.5356	12.54
NTC	2017-06-15	no amp	BHLH122	35.725
0-10	2017-06-19	21.3735	AKR4C9	23.2251
0-15	2017-06-19	20.3928	AKR4C9	23.2655
0-16	2017-06-19	20.0274	AKR4C9	22.6811
Control mean	2017-06-19	20.5979	AKR4C9	23.0572	2.45934	0.18183	-5.49966
100-13	2017-06-19	20.3293	AKR4C9	23.1826	0.393968	0.761034	-1.314
100-4	2017-06-19	21.0591	AKR4C9	21.8383	-1.68014	3.20459	3.20459
100-5	2017-06-19	23.84	AKR4C9	24.2921	-2.0072	4.02002	4.02002
100-7	2017-06-19	20.0326	AKR4C9	21.4455	-1.04636	2.06532	2.06532
100-8	2017-06-19	20.932	AKR4C9	22.7067	-0.68463	1.60729	1.60729
100-9	2017-06-19	20.5759	AKR4C9	22.6153	-0.41997	1.3379	1.3379
200-2	2017-06-19	21.8	AKR4C9	21.6397	-2.6196	6.1458	6.1458
200-3	2017-06-19	22.9116	AKR4C9	20.826	-4.54492	23.343	23.343
200-4	2017-06-19	20.9464	AKR4C9	22.2125	-1.19324	2.28666	2.28666
200-6	2017-06-19	22.0066	AKR4C9	19.9174	-4.54859	23.4026	23.4026
200-7	2017-06-19	22.3902	AKR4C9	21.0915	-3.75812	13.5303	13.5303
200-9	2017-06-19	22.0326	AKR4C9	20.3672	-4.12471	17.4447	17.4447
NTC	2017-06-19	no amp	AKR4C9	no amp
Notes
1 : Mean derived from three technical replicates for each sample, including NTC

## Sheet: summarized
	Mean
	BHLH122	AKR4C9
100	0.497306	1.40233
200	12.0928	13.6279
	STDEV
	BHLH122	AKR4C9
100	1.46968	1.95034
200	9.06451	8.45374
	SEM
	BHLH122	AKR4C9
100	0.428614	0.493753
200	1.06445	1.02797
