# Supplementary material for: Elevated temperature increases meiotic crossover frequency via the interfering (Type I) pathway in Arabidopsis thaliana
Source: PLoS Genet. 2018 May 17;14(5):e1007384. doi: 10.1371/journal.pgen.1007384 (PMC5976207; doi:10.1371/journal.pgen.1007384)
Supplement: S9 Table — (XLSX) [file pgen.1007384.s010.xlsx]

## Sheet: Sheet1
Table S9. Description of FTL intervals used in this study
FTL	Interval	Chromosome	Nucleotide position	Fluorescent protein
992	I1a	1	9850022	CFP
1313	I1a	1	11130549	dsRED2
1371	I3a	3	4319513	dsRED2
1500	I3a	3	498916	CFP
1143	I5cd	5	3760756	YFP
1963	I5cd	5	2372623	CFP
2450	I5cd	5	5497513	dsRED2
